# Supplementary material
Source: Springer Nature journal article supplement (https://www.springermedizin.de/resource/supplementary/12931_2013_1383_MOESM12_ESM.pdf/9426148)

### A. Promoter activity

- EGFP
- FOXJ1
- RFX3
- FOXJ1 + RFX3

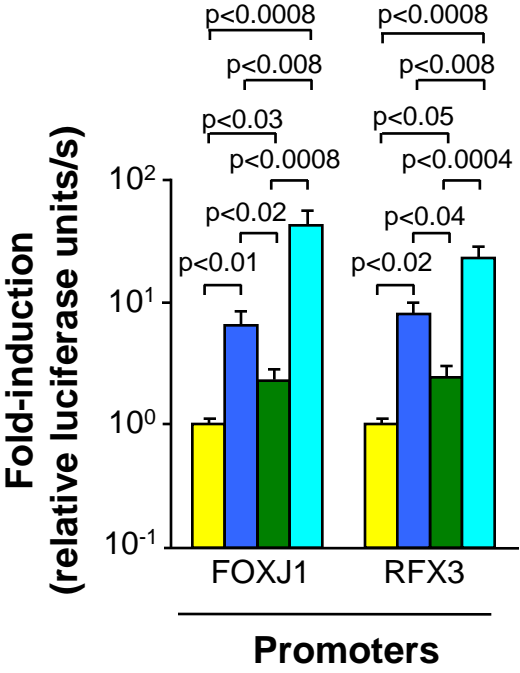

### B. mRNA

- EGFP
- RFX3

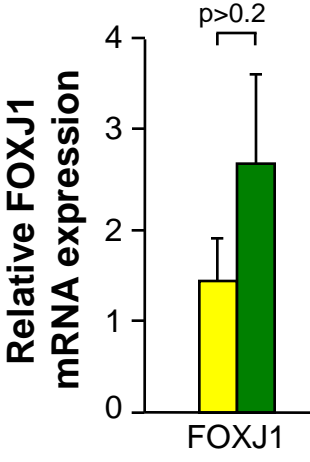

Supplement: MOESM12 [file 9426148]
